# Supplementary material for: Association between Eruption Sequence of Posterior Teeth, Dental Crowding, Arch Dimensions, Incisor Inclination, and Skeletal Growth Pattern
Source: MDPI journal article supplement (doi:10.3390/children10040674), 2023-04-01
Supplement: s1 [file s1]

|                                  |                  | Total arch space (mm) | Space 5_4_3 (right) (mm) | Space 2_1_1_2 (mm) | Space 3_4_5 (left) (mm) | TS-ALD (mm) | Tooth size 5_4_3 (right) (mm) | Tooth size 2_1_1_2 (mm) | Tooth size 3_4_5 (left) (mm) | Anterior arch length (mm) | Posterior arch length (mm) | Total arch length (mm) | Intermolar width (mm) | Intercanine width (mm) | Inclination Upper Incisor_NA (°) | Distance Upper Incisor_NA (mm) | ANB angle (°) | Wits (mm) | Mandibular plane (°) | Lower Facial Height (°) |
|----------------------------------|------------------|-----------------------|--------------------------|--------------------|-------------------------|-------------|-------------------------------|-------------------------|------------------------------|---------------------------|----------------------------|------------------------|-----------------------|------------------------|----------------------------------|--------------------------------|---------------|-----------|----------------------|-------------------------|
| Total arch space (mm)            | r                | 1                     | .655**                   | .436**             | .707**                  | .373**      | .449**                        | .290**                  | .468**                       | .373**                    | .419**                     | .588**                 | .598**                | .634**                 | .138                             | .242*                          | .114          | .064      | -.146                | .111                    |
|                                  | Sig. (bilateral) |                       | .000                     | .000               | .000                    | .001        | .000                          | .001                    | .000                         | .001                      | .000                       | .000                   | .000                  | .000                   | .218                             | .030                           | .309          | .570      | .195                 | .330                    |
| Space 5_4_3 (right) (mm)         | r                | .655**                | 1                        | -.041              | .591**                  | .556**      | .243*                         | -.036                   | .265*                        | .266*                     | .298**                     | .419**                 | .504                  | .529**                 | .058                             | .114                           | .036          | -.074     | -.176                | -.013                   |
|                                  | Sig. (bilateral) | .000                  |                          | .714               | .000                    | .000        | .029                          | .749                    | .170                         | .016                      | .007                       | .000                   | .000                  | .000                   | .609                             | .311                           | .747          | .513      | .116                 | .911                    |
| Space 2_1_1_2 (mm)               | r                | .436**                | -.041                    | 1                  | .016                    | -.077       | .325**                        | .617**                  | .354**                       | .152                      | .343**                     | .368**                 | .214                  | .267                   | -.014                            | .141                           | .188          | .109      | .173                 | .082                    |
|                                  | Sig. (bilateral) | 0,000                 | 0,714                    |                    | 0,888                   | .116        | .003                          | .000                    | .001                         | .176                      | .002                       | .001                   | .055                  | .061                   | .902                             | .208                           | .093          | .332      | .123                 | .467                    |
| Space 3_4_5 (left)               | r                | .707**                | .591**                   | .016               | 1                       | -.177       | .325**                        | .617**                  | .354**                       | 0,152                     | .343**                     | .368**                 | .214                  | .267                   | -.014                            | .141                           | .188          | .109      | .173                 | .082                    |
|                                  | Sig. (bilateral) | .000                  | .000                     | 0,888              |                         | .000        | .000                          | .849                    | .001                         | .000                      | .091                       | .000                   | .000                  | .001                   | .525                             | .477                           | .632          | .773      | .392                 | .065                    |
| TS-ALD (mm)                      | r                | .373**                | .566**                   | -.177              | .470**                  | 1           | -.450*                        | -.281*                  | -.362**                      | .315**                    | .004                       | .241*                  | .325**                | .047                   | .049                             | -.032                          | .089          | .048      | -.167                | -.002                   |
|                                  | Sig. (bilateral) | 0,001                 | 0,000                    | 116                | .000                    |             | .000                          | .012                    | .001                         | .004                      | .969                       | .031                   | .003                  | .749                   | .668                             | .778                           | 433           | .670      | .140                 | .998                    |
| Tooth size 5_4_3 (right) (mm)    | r                | .449**                | .243*                    | .325**             | .393**                  | -.450**     | 1                             | .222*                   | .894**                       | .061                      | .381**                     | .326**                 | .251*                 | .452**                 | .042                             | .153                           | -.052         | -.157     | .041                 | -.157                   |
|                                  | Sig. (bilateral) | .000                  | .019                     | .003               | .000                    | .000        |                               | .046                    | .000                         | .589                      | .000                       | .003                   | .024                  | .001                   | .710                             | .172                           | .646          | .163      | .718                 | .163                    |
| Tooth size 2_1_1_2 (mm)          | r                | .290**                | -.036                    | .617**             | .022                    | -.281*      | .222*                         | 1                       | .326**                       | .128                      | .244*                      | .277*                  | .115                  | .233                   | .055                             | .164                           | .099          | .123      | .048                 | .054                    |
|                                  | Sig. (bilateral) | .009                  | .749                     | .000               | .849                    | .012        | .046                          |                         | .003                         | .254                      | .028                       | .120                   | .307                  | .104                   | .629                             | .144                           | .379          | .274      | .670                 | .629                    |
| Tooth size 3_4_5 (left) (mm)     | r                | .468**                | .265*                    | .354**             | .364**                  | -.362**     | .894**                        | .326**                  | 1                            | .104                      | .361**                     | .344**                 | .252*                 | .503**                 | .089                             | .142                           | -.024         | -.093     | -.006                | -.212                   |
|                                  | Sig. (bilateral) | .000                  | .017                     | .001               | .001                    | .001        | .000                          | .003                    |                              | .357                      | .001                       | .002                   | .023                  | .000                   | .430                             | .205                           | .831          | .408      | .959                 | .058                    |
| Anterior arch length (mm)        | r                | .373**                | .266*                    | .152               | .448**                  | .315**      | .061                          | .128                    | .104                         | 1                         | -.103                      | .699**                 | .149                  | .134                   | .375**                           | .344**                         | .055          | .047      | .081                 | -.009                   |
|                                  | Sig. (bilateral) | .001                  | .016                     | .176               | .000                    | .004        | .589                          | .354                    | .357                         |                           | .360                       | .000                   | .184                  | .352                   | .001                             | .002                           | .250          | .678      | .472                 | .938                    |
| Posterior arch length (mm)       | r                | .419**                | .298**                   | .343**             | .189                    | .004        | .381**                        | .244*                   | .361**                       | -.103                     | 1                          | .671**                 | .345                  | .333*                  | -.148                            | -.048                          | -.028         | .029      | -.331*               | -.053                   |
|                                  | Sig. (bilateral) | .000                  | .007                     | .002               | .091                    | .969        | .000                          | .028                    | .001                         | .360                      |                            | .000                   | .002                  | .018                   | .189                             | .674                           | .806          | .800      | .003                 | .637                    |
| Total arch length (mm)           | r                | .588*                 | .419**                   | .368**             | .474                    | .241*       | .326**                        | .277                    | .344**                       | .660**                    | .671**                     | 1                      | .369**                | .346*                  | .167                             | .218                           | .016          | .055      | -.184                | -.047                   |
|                                  | Sig. (bilateral) | .000                  | .000                     | .001               | .000                    | .031        | .003                          | .012                    | .002                         | .000                      | .000                       |                        | .001                  | .014                   | .137                             | .050                           | .886          | .624      | .101                 | .679                    |
| Intermolar width (mm)            | r                | .598**                | .504**                   | .214               | .459**                  | .325**      | .251*                         | .115                    | .252*                        | .149                      | .345**                     | .369**                 | 1                     | .572**                 | 0,029                            | .101                           | -.196         | -.206     | -.061                | -.063                   |
|                                  | Sig. (bilateral) | .000                  | .000                     | .005               | .000                    | .003        | .024                          | .307                    | .023                         | .184                      | .002                       | .001                   |                       | .000                   | .794                             | .367                           | .077          | .063      | .586                 | .575                    |
| Intercanine width (mm)           | r                | .634**                | .529**                   | .267               | .464**                  | .047        | .052**                        | .233                    | .503**                       | .134                      | .333*                      | .346*                  | .572**                | 1                      | .097                             | .238                           | -.221         | -.114     | -.355*               | -.296*                  |
|                                  | Sig. (bilateral) | .000                  | .000                     | .061               | .001                    | .749        | .001                          | .104                    | .000                         | .352                      | .018                       | .014                   | .000                  |                        | .502                             | .096                           | .122          | .429      | .011                 | .037                    |
| Inclination Upper Incisor_NA (°) | r                | .138                  | .058                     | -.014              | -.072                   | .049        | .042                          | .055                    | .089                         | .375**                    | -.148                      | .167                   | .029                  | .097                   | 1                                | .742**                         | -.306         | -.078     | -.058                | -.158                   |
|                                  | Sig. (bilateral) | .218                  | .609                     | .902               | .525                    | .668        | .710                          | .629                    | .430                         | .001                      | .189                       | .137                   | .794                  | .502                   |                                  | .000                           | .002          | .439      | .569                 | .117                    |
| Distance Upper Incisor_NA (mm)   | r                | .242*                 | .114                     | .141               | .086                    | -.032       | .153                          | .164                    | .142                         | .344**                    | -.048                      | .218                   | .101                  | .238                   | .742**                           | 1                              | -.247*        | -.133     | .097                 | .007                    |
|                                  | Sig. (bilateral) | .030                  | .311                     | .208               | .447                    | .778        | .172                          | .144                    | .205                         | .002                      | .674                       | .050                   | .367                  | .096                   | .000                             |                                | .013          | .187      | .336                 | .942                    |
| ANB (°)                          | r                | .114                  | .036                     | .188               | .054                    | .089        | -.52                          | .099                    | -.024                        | .055                      | -.028                      | .016                   | -.196                 | -.221                  | -.306**                          | -.247*                         | 1             | .576**    | .221*                | .320**                  |
|                                  | Sig. (bilateral) | .309                  | .747                     | .093               | .632                    | .433        | .646                          | .379                    | .831                         | .625                      | .806                       | .886                   | .077                  | .122                   | .002                             | .013                           |               | .000      | .027                 | .001                    |
| Wits (mm)                        | r                | .064                  | -.074                    | .109               | -.032                   | .048        | -.157                         | .123                    | -.093                        | .047                      | .029                       | .055                   | -.206                 | -.144                  | -.078                            | -.133                          | .576**        | 1         | -.123                | -.032                   |
|                                  | Sig. (bilateral) | .570                  | .513                     | .332               | .773                    | .670        | .163                          | .274                    | .408                         | .678                      | .800                       | .624                   | .063                  | .429                   | .439                             | .187                           | 0,000         |           | .222                 | .754                    |
| Mandibular plane (°)             | r                | -.146                 | -.176                    | .173               | -.096                   | -.167       | .041                          | .048                    | -.006                        | .081                      | -.331**                    | -.184                  | -.061                 | -.355                  | -.058                            | .097                           | .000          | -.123     | 1                    | .432**                  |
|                                  | Sig. (bilateral) | .195                  | .116                     | .123               | .392                    | .140        | .718                          | .670                    | .959                         | .472                      | .003                       | .101                   | .586                  | .011                   | .569                             | .336                           | .027          | .222      |                      | .000                    |
| Lower Facial Height (°)          | r                | -.110                 | -.13                     | .082               | -.206                   | -.002       | -.157                         | .054                    | -.212                        | -.009                     | -.053                      | -.047                  | -.063                 | -.296*                 | -.158                            | .007                           | .320**        | -.032     | .432**               | 1                       |
|                                  | Sig. (bilateral) | .330                  | .911                     | .467               | .065                    | .988        | .163                          | .629                    | .058                         | .938                      | .637                       | .679                   | .575                  | .037                   | .117                             | .942                           | .001          | .754      | .000                 |                         |

Figure S1. Pearson Correlation coefficients (r) for outcomes measured in the UPPER ARCH. Sig: p value, two-sided.
