# Supplementary material for: Association between Eruption Sequence of Posterior Teeth, Dental Crowding, Arch Dimensions, Incisor Inclination, and Skeletal Growth Pattern
Source: MDPI journal article supplement (doi:10.3390/children10040674), 2023-04-01
Supplement: s1 [file s1]

|                                  |                  | Total arch space (mm) | Space 5_4_3 (right) (mm) | Space 2_1_1_2 (mm) | Space 3_4_5 (left) (mm) | TS-ALD (mm) | Tooth size 5_4_3 (right) (mm) | Tooth size 2_1_1_2 (mm) | Tooth size 3_4_5 (left) (mm) | Anterior arch length (mm) | Posterior arch length (mm) | Total arch length (mm) | Intermolar width (mm) | Intercanine width (mm) | Inclination Upper Incisor_NA (°) | Distance Upper Incisor_NA (mm) | ANB angle (°) | Wits (mm) | Mandibular plane (°) | Lower Facial Height (°) |
|----------------------------------|------------------|-----------------------|--------------------------|--------------------|-------------------------|-------------|-------------------------------|-------------------------|------------------------------|---------------------------|----------------------------|------------------------|-----------------------|------------------------|----------------------------------|--------------------------------|---------------|-----------|----------------------|-------------------------|
| Total arch space (mm)            | r                | 1                     | .653**                   | .298*              | .760**                  | .158        | .457**                        | .368*                   | .450**                       | .271                      | .212                       | .402**                 | .284                  | .277                   | .159                             | .235                           | .135          | .080      | -.095                | -.039                   |
|                                  | Sig. (bilateral) |                       | .000                     | .047               | .000                    | .283        | .001                          | .010                    | .001                         | .062                      | .147                       | .005                   | .053                  | .108                   | .280                             | .108                           | .360          | .591      | .019                 | .790                    |
| Space 5_4_3 (right) (mm)         | r                | .653**                | 1                        | .167               | .809**                  | .419**      | .327                          | .249                    | .317*                        | .327*                     | .302*                      | .522**                 | .258                  | .176                   | .187                             | .065                           | -.048         | -.960     | -.209                | .041                    |
|                                  | Sig. (bilateral) | .000                  |                          | .256               | .000                    | .003        | .230                          | .088                    | .028                         | .023                      | .037                       | .000                   | .080                  | .312                   | .203                             | .660                           | .747          | .517      | .153                 | .783                    |
| Space 2_1_1_2 (mm)               | r                | .298*                 | .167                     | 1                  | .137                    | -.016       | .374**                        | .559**                  | .391*                        | .100                      | .266                       | .272                   | .186                  | .610**                 | .227                             | .097                           | .029          | -.066     | .131                 | -.050                   |
|                                  | Sig. (bilateral) | .047                  | .256                     |                    | .351                    | .913        | .009                          | .000                    | .006                         | .500                      | .122                       | .062                   | .211                  | .000                   | .121                             | .512                           | .847          | .657      | .376                 | .735                    |
| Space 3_4_5 (left)               | r                | .760**                | .809**                   | .138               | 1                       | .380**      | .344*                         | .367*                   | .334                         | .262                      | .304*                      | .471**                 | .255                  | .308                   | .193                             | .148                           | .103          | .035      | -.123                | -.014                   |
|                                  | Sig. (bilateral) | .000                  | .000                     | .351               |                         | .008        | .017                          | 0.010                   | .020                         | .072                      | .036                       | .001                   | .084                  | .072                   | .189                             | .314                           | .492          | .814      | .405                 | .025                    |
| TS-ALD (mm)                      | r                | .158                  | .419**                   | -.016              | .380**                  | 1           | -.554**                       | -.293*                  | -.555*                       | .244                      | -.137                      | .085                   | .083                  | .098                   | -.022                            | .140                           | -.128         | .075      | -.287*               | .230                    |
|                                  | Sig. (bilateral) | .283                  | .003                     | .913               | .008                    |             | .000                          | .043                    | .000                         | .095                      | .353                       | .565                   | .578                  | .574                   | .880                             | .342                           | .384          | .612      | .048                 | .116                    |
| Tooth size 5_4_3 (right) (mm)    | r                | .457**                | .327*                    | .374**             | .344*                   | -.554**     | 1                             | .472**                  | .987*                        | -.049                     | .391**                     | .289*                  | .118                  | .086                   | .139                             | .215                           | .128          | -.004     | .052                 | -.296*                  |
|                                  | Sig. (bilateral) | .001                  | .023                     | .009               | .017                    | .000        |                               | .001                    | .000                         | .739                      | .006                       | .046                   | .431                  | .622                   | .346                             | .143                           | .384          | .977      | .728                 | .041                    |
| Tooth size 2_1_1_2 (mm)          | r                | .368*                 | .249                     | .559**             | .367*                   | -.293*      | .472**                        | 1                       | .469**                       | .015                      | .487**                     | .420**                 | .293*                 | .487**                 | .332                             | .252                           | .228          | -.016     | .148                 | .057                    |
|                                  | Sig. (bilateral) | .010                  | .088                     | .000               | .010                    | .043        | .001                          |                         | .001                         | .918                      | .000                       | .003                   | .046                  | .003                   | .021                             | .084                           | .119          | .914      | .315                 | .702                    |
| Tooth size 3_4_5 (left) (mm)     | r                | .450**                | .317*                    | .391**             | .334                    | -.555**     | .987                          | .469**                  | 1                            | -.076                     | .395**                     | .270                   | .108                  | .110                   | .131                             | .195                           | .119          | -.033     | .080                 | -.261                   |
|                                  | Sig. (bilateral) | .001                  | .028                     | .006               | .020                    | .000        | .000                          | .001                    |                              | .609                      | .006                       | .063                   | .047                  | .531                   | .376                             | .185                           | .422          | .824      | .588                 | .073                    |
| Anterior arch length (mm)        | r                | .271                  | .327*                    | .100               | .262                    | .244        | -.049                         | .015                    | -.076                        | 1                         | -.279                      | .589**                 | .077                  | .126                   | .412**                           | .290*                          | .011          | -.094     | -.175                | -.131                   |
|                                  | Sig. (bilateral) | .062                  | .032                     | .500               | .071                    | .095        | .739                          | .918                    | .609                         |                           | .055                       | .000                   | .605                  | .472                   | .004                             | .046                           | .943          | .527      | .235                 | .373                    |
| Posterior arch length (mm)       | r                | .212                  | .302*                    | .226               | .304*                   | -.137       | .391**                        | .487**                  | .395**                       | -.279                     | 1                          | .612**                 | .273                  | .330                   | .084                             | .266                           | .156          | .067      | .092                 | .222                    |
|                                  | Sig. (bilateral) | .147                  | .037                     | .122               | .036                    | .353        | .006                          | .000                    | .006                         | .055                      |                            | .000                   | .063                  | .053                   | .570                             | .068                           | .289          | .650      | .533                 | .129                    |
| Total arch length (mm)           | r                | .402**                | .522**                   | .272               | .471**                  | .085        | .289*                         | .420**                  | .270                         | .589**                    | .612**                     | 1                      | .290*                 | .328                   | .409**                           | .463**                         | .138          | -.021     | -.066                | .078                    |
|                                  | Sig. (bilateral) | .005                  | .000                     | .062               | .001                    | .565        | .046                          | .003                    | .063                         | .000                      | .000                       |                        | .048                  | .054                   | .004                             | .001                           | .348          | .885      | .655                 | .597                    |
| Intermolar width (mm)            | r                | .284                  | .258                     | .186               | .255                    | .083        | .118                          | .293*                   | .108                         | .077                      | .273                       | .290*                  | 1                     | .201                   | .078                             | .159                           | .119          | -.029     | .255                 | .292*                   |
|                                  | Sig. (bilateral) | .045                  | .080                     | .211               | .084                    | .578        | .431                          | .046                    | .470                         | .605                      | .063                       | .048                   |                       | .247                   | .601                             | .285                           | .427          | .846      | .084                 | .046                    |
| Intercanine width (mm)           | r                | .277                  | .176                     | .610**             | .308                    | .098        | .086                          | .487**                  | .110                         | .126                      | .330                       | .328                   | .201                  | 1                      | .155                             | -.008                          | .192          | .047      | -.144                | .081                    |
|                                  | Sig. (bilateral) | .108                  | .312                     | .000               | .072                    | .574        | .622                          | .003                    | .531                         | .472                      | .053                       | .054                   | .247                  |                        | .375                             | .965                           | .269          | .786      | .410                 | .642                    |
| Inclination Upper Incisor_NA (°) | r                | .159                  | .187                     | .227               | .193                    | -.022       | .139                          | .332*                   | .131                         | .412**                    | .840                       | .409**                 | .078                  | .155                   | 1                                | .299**                         | .341**        | .118      | -.028                | -.001                   |
|                                  | Sig. (bilateral) | .280                  | .203                     | .121               | .1189                   | .880        | .346                          | .021                    | .376                         | .004                      | .570                       | .004                   | .601                  | .375                   |                                  | .002                           | .001          | .242      | .783                 | .992                    |
| Distance Upper Incisor:NA (mm)   | r                | .235                  | .065                     | .097               | .148                    | -.140       | .215                          | .252                    | .195                         | .290*                     | .266                       | .463**                 | .159                  | -.008                  | .299**                           | 1                              | .306**        | .124      | .105                 | .180                    |
|                                  | Sig. (bilateral) | .108                  | .660                     | .512               | .314                    | .342        | .143                          | .084                    | .185                         | .046                      | .068                       | .001                   | .285                  | .965                   | .002                             |                                | .002          | .218      | .298                 | .073                    |
| ANB (°)                          | r                | .135                  | -.048                    | .029               | .102                    | -.128       | .128                          | .228                    | .119                         | .011                      | .156                       | .138                   | .119                  | .192                   | .341**                           | .306**                         | 1             | .576**    | .221*                | .320**                  |
|                                  | Sig. (bilateral) | .360                  | .747                     | .847               | .492                    | .384        | .384                          | .119                    | .422                         | .943                      | .289                       | .348                   | .427                  | .269                   | .001                             | .002                           |               | .000      | .027                 | .001                    |
| Wits (mm)                        | r                | .080                  | -.096                    | -.066              | .035                    | .075        | -.004                         | -.016                   | -.003                        | -.094                     | .067                       | -.021                  | -.029                 | .047                   | .118                             | .124                           | .576**        | 1         | -0.123               | -.032                   |
|                                  | Sig. (bilateral) | .591                  | .517                     | .657               | .814                    | .612        | .977                          | .914                    | .824                         | .527                      | .650                       | .885                   | .846                  | .786                   | .242                             | .218                           | .000          |           | .222                 | .654                    |
| Mandibular plane (°)             | r                | -.095                 | -.209                    | .131               | -.123                   | -.287*      | .052                          | .148                    | .080                         | -.175                     | .092                       | -.066                  | .255                  | -.144                  | -.028                            | .105                           | .221*         | -.123     | 1                    | .432**                  |
|                                  | Sig. (bilateral) | .519                  | .153                     | .376               | .405                    | .048        | .728                          | .315                    | .588                         | .235                      | .533                       | .655                   | .084                  | .410                   | .783                             | .298                           | .027          | .222      |                      | .000                    |
| Lower Facial Height (°)          | r                | -.039                 | .041                     | -.050              | -.014                   | .230        | -.296*                        | .057                    | -.261                        | -.131                     | .222                       | .078                   | .292*                 | .081                   | -.001                            | .180                           | .320**        | -.320     | .432**               | 1                       |
|                                  | Sig. (bilateral) | .790                  | .783                     | .735               | .925                    | .116        | .041                          | .702                    | .073                         | .373                      | .129                       | .597                   | .046                  | .642                   | .992                             | .073                           | .001          | .754      | .000                 |                         |

Figure S2. Pearson Correlation coefficients (r) for outcomes measured in the LOWER ARCH. Sig: p value, two-sided.
